# Supplementary figures and images for: Challenging wax-cast figurine serial production unravelled by multi-analytical techniques
Source: Royal Society of Chemistry journal article supplement (doi:10.1039/c4ja00415a), 2015-01-01

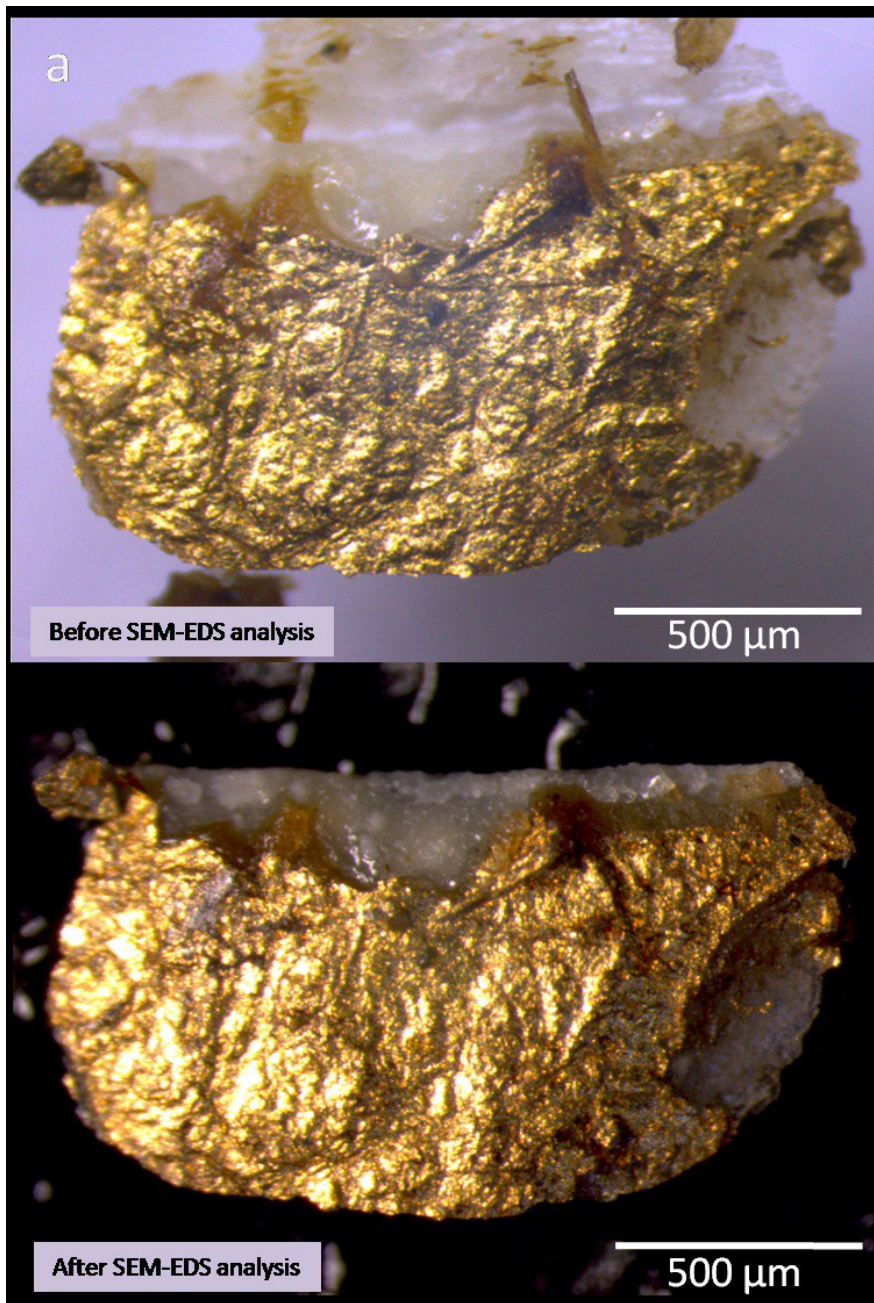

Supplement: c4ja00415a1.pdf [file c4ja00415a1.pdf]
